# Supplementary material for: Hydrostatic Pressure Helps to Cultivate an Original Anaerobic Bacterium From the Atlantis Massif Subseafloor (IODP Expedition 357): Petrocella atlantisensis gen. nov. sp. nov
Source: PubMed Central journal article supplement (PMC6647913; doi:10.3389/fmicb.2019.01497), 2019-07-16
Supplement: Data_Sheet_2.pdf [file Data_Sheet_2.pdf]

**Hydrostatic pressure helps to cultivate an original anaerobic bacterium from the Atlantis Massif seafloor (IODP Expedition 357):**

*Petrocella atlantisensis* gen. nov. sp. nov.

Marianne Quéméneur<sup>1</sup>, Gaël Erauso<sup>1</sup>, Eléonore Frouin<sup>1</sup>, Emna Zeghal<sup>1</sup>, Céline Vandecasteele<sup>2</sup>, Bernard Ollivier<sup>1</sup>, Christian Tamburini<sup>1</sup>, Marc Garel<sup>1</sup>, Bénédicte Ménez<sup>3</sup>, Anne Postec<sup>1\*</sup>

*Supplementary Figures and Tables*

A

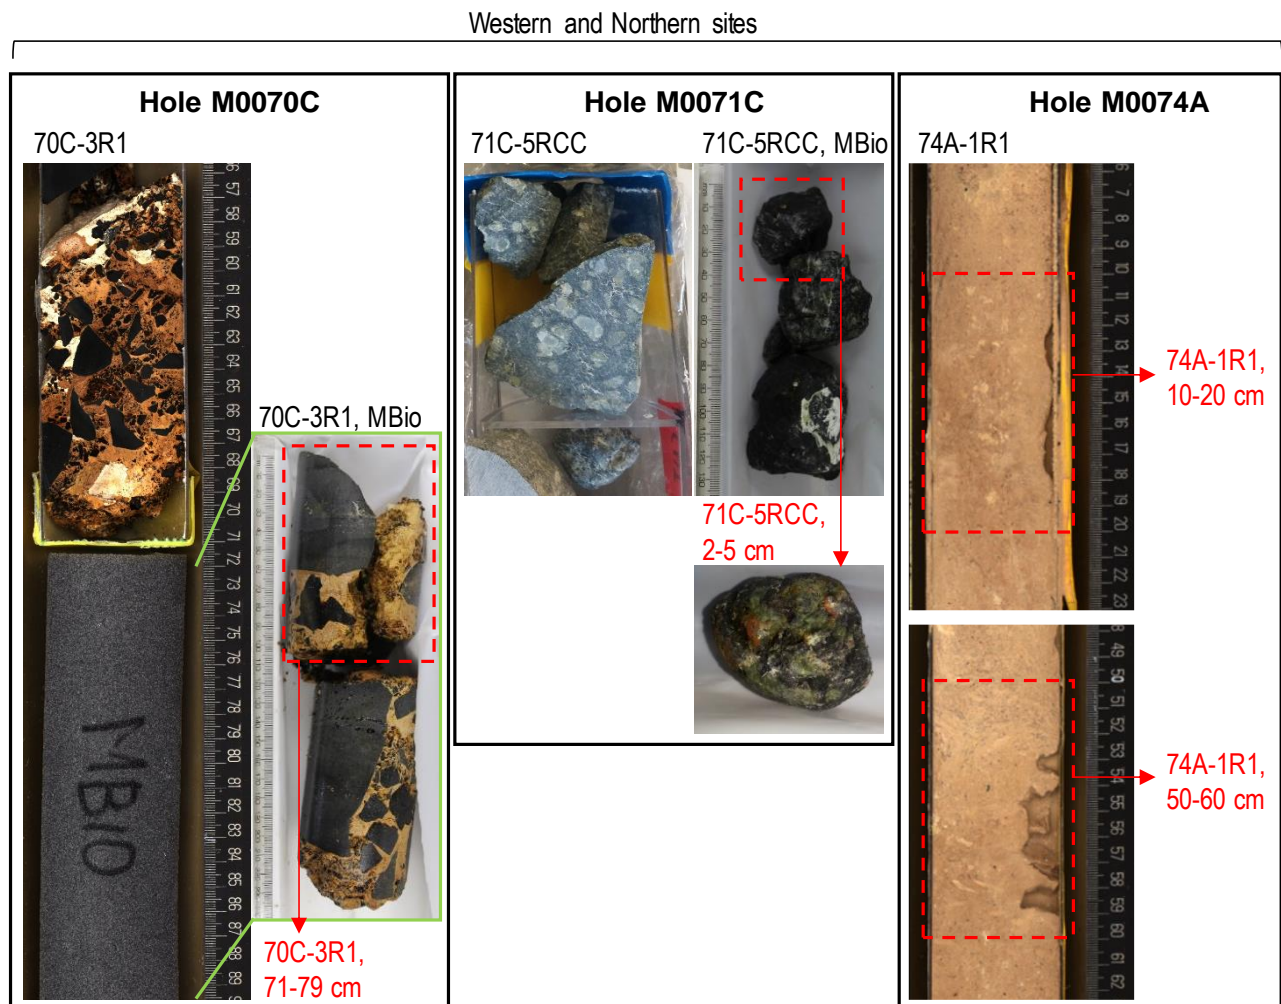

**Supplementary Figure 1 (continued next page).** Photographs of the IODP Expedition 357 core samples used in this study (Table 1). MBio refers to core sections sampled for microbiological characterization. (A) Western and Northern sites.

B

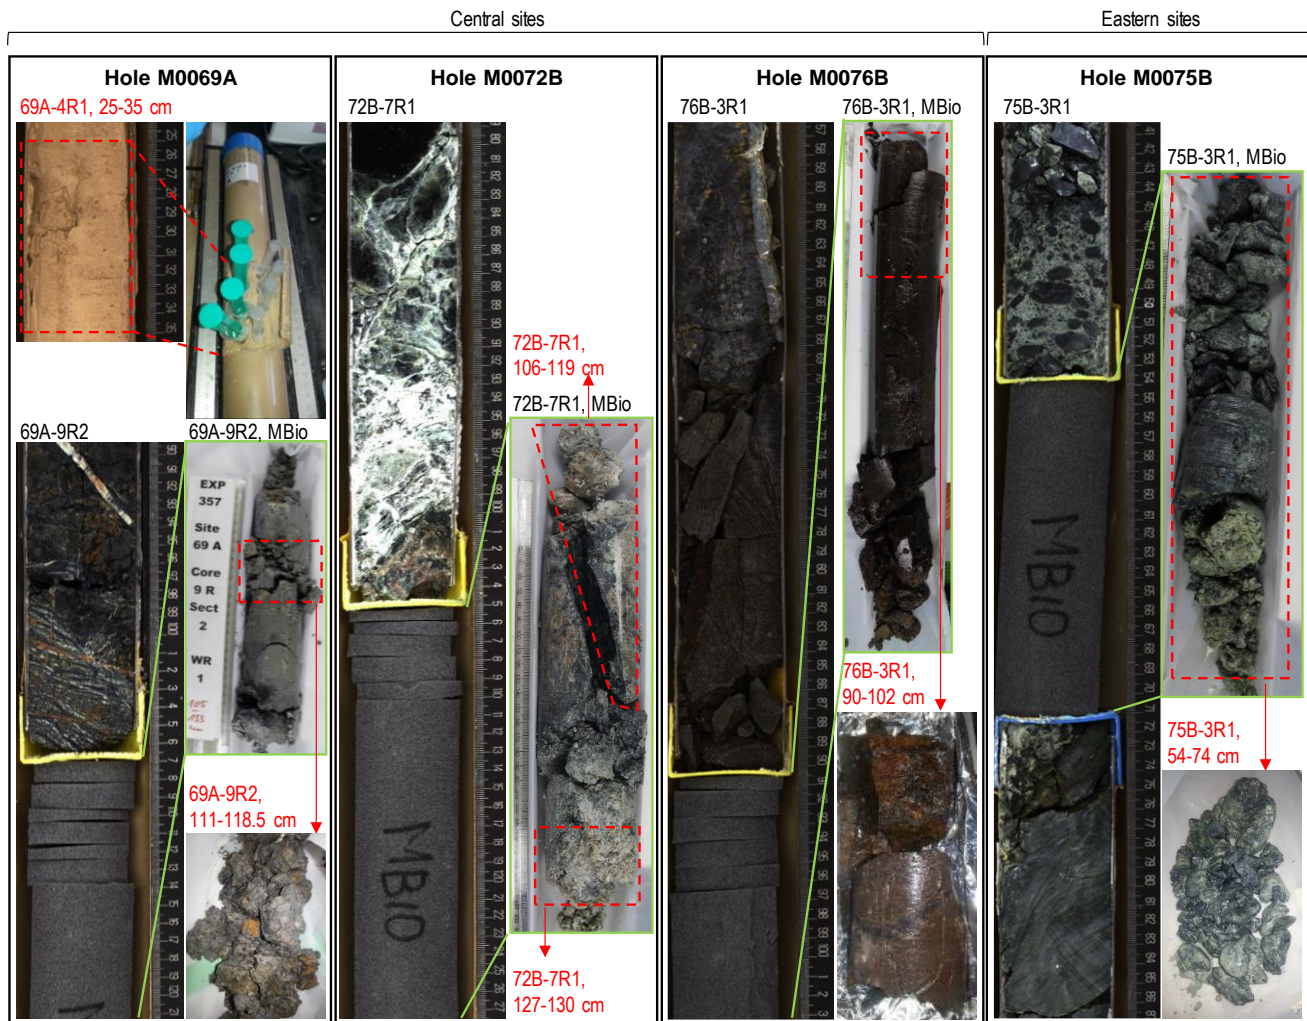

**Supplementary Figure 1 (continued).** Photographs of the IODP Expedition 357 core samples used in this study (Table 1). MBio refers to core sections sampled for microbiological characterization. (B) Central and Eastern sites.

A

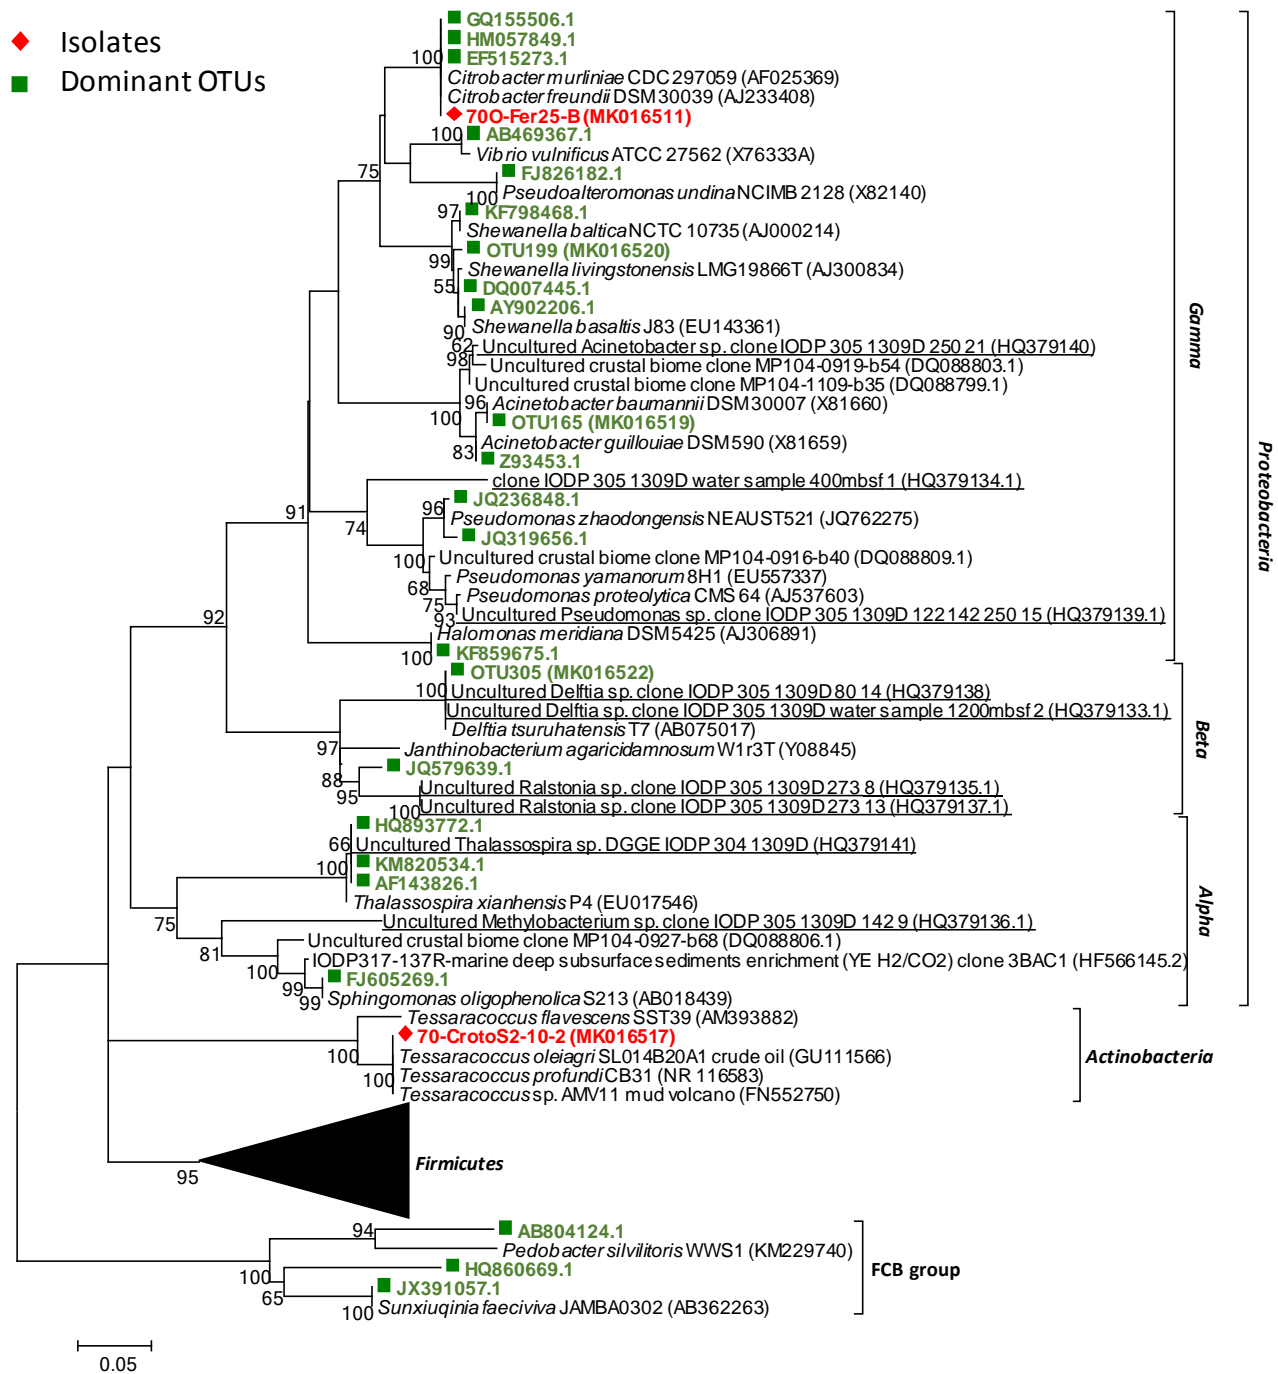

**Supplementary Figure 2 (continued next page).** Maximum likelihood phylogenetic trees based on 16S rRNA gene sequences showing the position of the bacterial isolates obtained in this study and the dominant OTUs (>10%) obtained in the enrichment cultures from rock samples cored in the Atlantis Massif. (A) All bacteria except *Firmicutes*, (B) *Firmicutes*. Clone sequences from IODP Expeditions 304 and 305 Hole 1309D (Atlantis Massif) are underlined (Mason et al., 2010). The Kimura 2 parameter was used, and the analysis involved 110 sequences and 386 aligned base pairs. Bootstrap values higher than 50% (based on 1,000 replicates) are shown at branch nodes. Accession numbers of type species are indicated in parentheses. Bar, in substitutions per nucleotide.

B

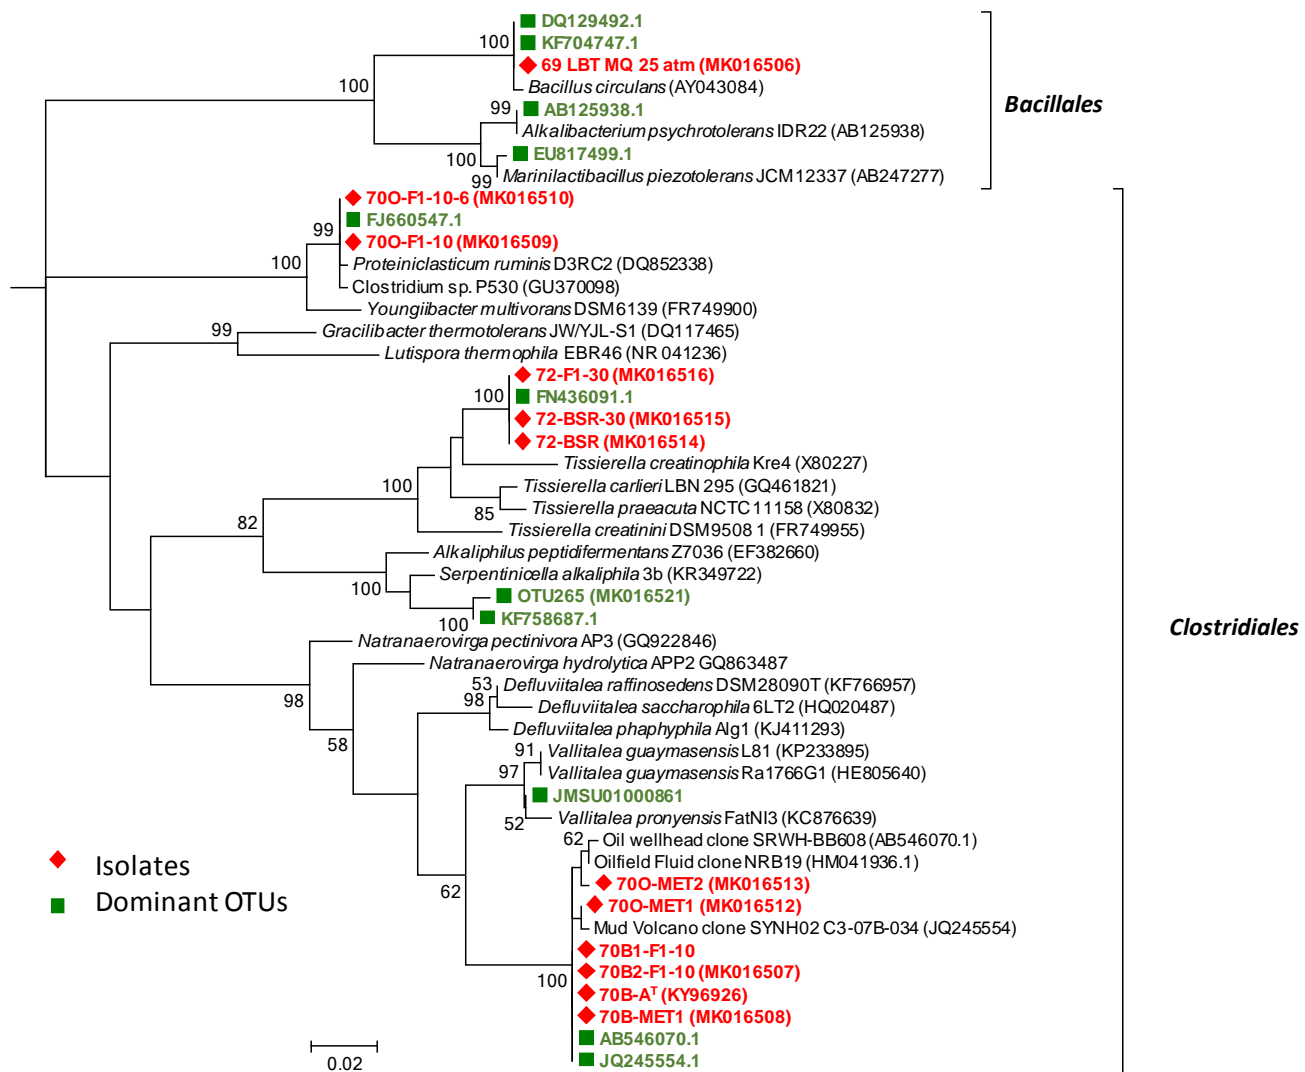

**Supplementary Figure 2 (continued).** Maximum likelihood phylogenetic trees based on 16S rRNA gene sequences showing the position of the bacterial isolates obtained in this study and the dominant OTUs (>10%) obtained in the enrichment cultures from rock samples cored in the Atlantis Massif. (A) All bacteria except *Firmicutes*, (B) *Firmicutes*. Clone sequences from IODP Expeditions 304 and 305 Hole 1309D (Atlantis Massif) are underlined (Mason et al., 2010). The Kimura 2 parameter was used, and the analysis involved 110 sequences and 386 aligned base pairs. Bootstrap values higher than 50% (based on 1,000 replicates) are shown at branch nodes. Accession numbers of type species are indicated in parentheses. Bar, in substitutions per nucleotide.

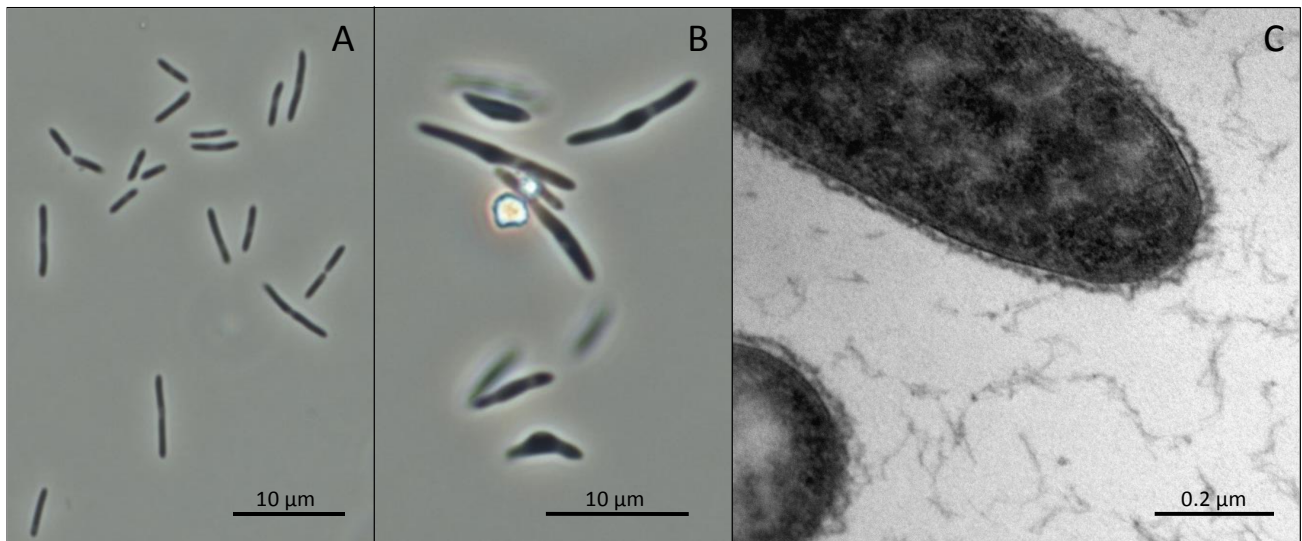

**Supplementary Figure 3.** Phase contrast microphotographs of strain 70B-A<sup>T</sup> in exponential growth phase (A), under stress conditions with inflated and deformed cells (B), and ultrathin section transmission electron microscopy micrograph showing the absence of outer membrane typical of a Gram-positive cell wall (C).

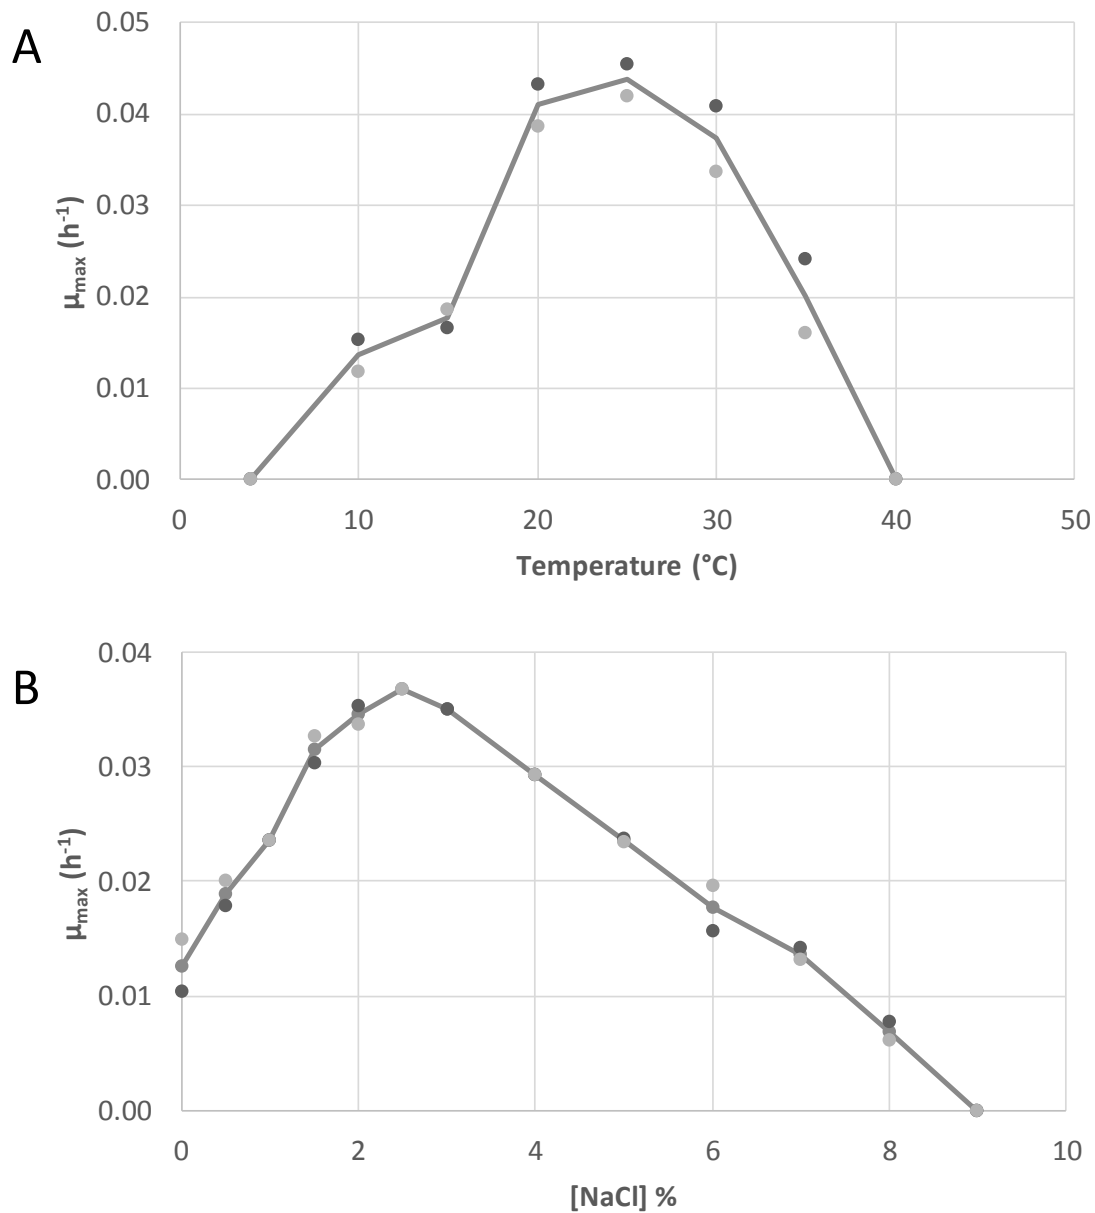

**Supplementary Figure 4.** Growth of strain 70B-A<sup>T</sup> according to temperature (A) and NaCl concentration (B). The two maximum specific growth rate  $\mu_{\max}$  (h<sup>-1</sup>) of duplicated cultures are shown with mean curves. Maximal growth was observed at 25°C (range 10 – 35°C) and 2.5% (w/v) of NaCl (range 1 – 8 %).

**Supplementary Table 1.** Culture media composition. F, SRB, MET and FE correspond to onshore culture media targeting fermenters, sulfate reducers, methanogens and iron-reducers, respectively. BM = Basal Medium used for strain 70B-A<sup>T</sup> physiological characterization. F, MAch2, MH2, MMet, SAc and SH2 correspond to onboard culture media targeting fermenters, acetotrophic and/or hydrogenotrophic and methylotrophic methanogens, and acetotrophic and hydrogenotrophic sulfate reducers.

| Component                                                                       | Onshore culture media |                 |      |                   |      |                   |       |      | Onboard culture media |                                             |                                |      |     |                                |
|---------------------------------------------------------------------------------|-----------------------|-----------------|------|-------------------|------|-------------------|-------|------|-----------------------|---------------------------------------------|--------------------------------|------|-----|--------------------------------|
|                                                                                 | F1                    | F2 <sup>1</sup> | SRB1 | SRB2 <sup>2</sup> | MET1 | MET2 <sup>2</sup> | FE    | BM   | F                     | MAch2 <sup>3</sup>                          | MH2                            | MMet | SAc | SH2                            |
| Acetate (g l <sup>-1</sup> )                                                    | 1                     | 0.1             | 1.6  | -                 | 1.6  | -                 | 1.6   | -    | -                     | 1.6                                         | -                              | -    | 1.6 | -                              |
| Balch oligo elements solution (ml l <sup>-1</sup> ) <sup>4</sup>                | -                     | -               | -    | -                 | 1    | 1                 | -     | -    | 10                    | 10                                          | 10                             | 10   | -   | -                              |
| CaCl <sub>2</sub> (g l <sup>-1</sup> )                                          | 0.1                   | 0.1             | 0.1  | 0.1               | 0.1  | 0.1               | 0.1   | 0.1  | 0.1                   | 0.1                                         | 0.1                            | 0.1  | 0.1 | 0.1                            |
| Crotonate (g l <sup>-1</sup> )                                                  | 1                     | 0.1             | -    | -                 | -    | -                 | -     | -    | -                     | -                                           | -                              | -    | -   | -                              |
| Fe, Ni, Wo, Se solution (ml l <sup>-1</sup> ) <sup>5</sup>                      | 1                     | 1               | 1    | 1                 | 1    | 1                 | 1     | -    | -                     | 1                                           | 1                              | 1    | -   | -                              |
| Formate (mM) or H <sub>2</sub> CO <sub>2</sub> (80/20 v/v 2 bars)               | -                     | -               | -    | 40                | -    | 40                | -     | -    | -                     | H <sub>2</sub> CO <sub>2</sub> <sup>3</sup> | H <sub>2</sub> CO <sub>2</sub> | -    | -   | H <sub>2</sub> CO <sub>2</sub> |
| Iron(III) citrate (mM)                                                          | -                     | -               | -    | -                 | -    | -                 | 5     | -    | -                     | -                                           | -                              | -    | -   | -                              |
| KCl (g l <sup>-1</sup> )                                                        | 0.3                   | 0.3             | 0.3  | 0.3               | 0.3  | 0.3               | 0.3   | 0.3  | 0.1                   | 0.1                                         | 0.1                            | 0.1  | 0.1 | 0.1                            |
| KH <sub>2</sub> PO <sub>4</sub> (g l <sup>-1</sup> )                            | 0.3                   | 0.3             | 0.3  | 0.3               | 0.3  | 0.3               | 0.3   | 0.3  | 0.3                   | 0.3                                         | 0.3                            | 0.3  | 0.3 | 0.3                            |
| Lactate (mM)                                                                    | -                     | -               | 20   | -                 | -    | -                 | 10    | -    | -                     | -                                           | -                              | -    | -   | -                              |
| L-Cysteine-HCl (g l <sup>-1</sup> )                                             | 0.5                   | 0.5             | 0.5  | 0.5               | 0.5  | 0.5               | 0.044 | -    | 0.5                   | 0.5                                         | 0.5                            | 0.5  | -   | -                              |
| Methanol (mM)                                                                   | -                     | -               | -    | -                 | 30   | -                 | -     | -    | -                     | -                                           | -                              | 30   | -   | -                              |
| MgCl <sub>2</sub> ·6H <sub>2</sub> O 50 g l <sup>-1</sup> (ml l <sup>-1</sup> ) | 20                    | 20              | 20   | 20                | 20   | 20                | 20    | 20   | 2                     | 2                                           | 2                              | 2    | 2   | 2                              |
| Na <sub>2</sub> CO <sub>3</sub> 8%                                              | Up to required pH     |                 |      |                   |      |                   |       |      |                       |                                             |                                |      |     |                                |
| Na <sub>2</sub> S 3% (ml l <sup>-1</sup> )                                      | 20                    | 20              | 20   | 20                | 20   | 20                | -     | 20   | 20                    | 20                                          | 20                             | 20   | 20  | 20                             |
| Na <sub>2</sub> SO <sub>4</sub> (g l <sup>-1</sup> )                            | -                     | -               | 3    | 3                 | -    | -                 | 0.1   | -    | -                     | -                                           | -                              | -    | 3   | 3                              |
| NaCl (g l <sup>-1</sup> )                                                       | 10                    | 10              | 10   | 10                | 10   | 10                | 10    | 25   | 20                    | 20                                          | 20                             | 20   | 20  | 20                             |
| NH <sub>4</sub> Cl (g l <sup>-1</sup> )                                         | 0.5                   | 0.5             | 0.5  | 0.5               | 0.5  | 0.5               | 0.5   | 0.5  | 0.1                   | 1                                           | 1                              | 1    | 1   | 1                              |
| Peptone (g l <sup>-1</sup> )                                                    | 1                     | 0.1             | -    | -                 | -    | -                 | -     | -    | -                     | -                                           | -                              | -    | -   | -                              |
| Pyruvate (mM)                                                                   | -                     | -               | -    | -                 | -    | -                 | 10    | -    | -                     | -                                           | -                              | -    | -   | -                              |
| Resazurine (0.1 % (ml l <sup>-1</sup> ))                                        | 0.3                   | 0.3             | 0.3  | 0.3               | 0.3  | 0.3               | -     | 0.3  | 0.3                   | 0.3                                         | 0.3                            | 0.3  | 0.3 | 0.3                            |
| Trimethylamine (mM)                                                             | -                     | -               | -    | -                 | 10   | -                 | -     | -    | -                     | -                                           | -                              | -    | -   | -                              |
| Tris (g l <sup>-1</sup> )                                                       | 2.4                   | 2.4             | 2.4  | 2.4               | 2.4  | 2.4               | 2.4   | 2.4  | 3                     | 3                                           | 3                              | 3    | 3   | 3                              |
| Tryptone (g l <sup>-1</sup> )                                                   | 1                     | 0.1             | 0.1  | 0.1               | 0.1  | 0.1               | 0.1   | -    | 2                     | -                                           | -                              | -    | 0.5 | 0.5                            |
| Widdel trace element solution (ml l <sup>-1</sup> ) <sup>6</sup>                | 1                     | 1               | 1    | 1                 | -    | -                 | 1     | -    | -                     | -                                           | -                              | -    | 1   | 1                              |
| Yeast extract (g l <sup>-1</sup> )                                              | 1                     | 0.1             | 0.1  | 0.1               | 0.1  | 0.1               | 0.1   | 0.05 | 2                     | 0.5                                         | 0.5                            | 0.5  | 0.5 | 0.5                            |

<sup>1</sup> F2 only used for enrichment culture at 0.1 MPa; <sup>2</sup> H<sub>2</sub>CO<sub>2</sub> in cultures at 0.1 MPa, replaced by formate in HP cultures; <sup>3</sup> H<sub>2</sub>CO<sub>2</sub> was added in cultures from M0069A-9R2; <sup>4</sup>(Balch et al., 1979); <sup>5</sup>Fe, Ni, Wo, Se solution contained (l<sup>-1</sup>): FeSO<sub>4</sub>·7 H<sub>2</sub>O 1.42 g, NiSO<sub>4</sub>·6H<sub>2</sub>O 1.6 g, Na<sub>2</sub>WO<sub>4</sub>·2 H<sub>2</sub>O 38 mg and Na<sub>2</sub>SeO<sub>3</sub>·5 H<sub>2</sub>O 3 mg; <sup>6</sup>(Widdel and Pfennig, 1981).

**Supplementary Table 2.** Sample name used in this study and corresponding description in Sequence Read Archive (SRA), with core sample data, culture media and conditions used for enrichment cultures (Description of the culture media can be found in Supplementary Table 1 and precise depths of the core samples are detailed in Supplementary Figure 1).

| Name used in this study | Description in SRA  | IODP Expedition 357 core sample | Culture medium | Growth temperature (°C) | Hydrostatic pressure for incubation (MPa) | Biological replicate / subculture |
|-------------------------|---------------------|---------------------------------|----------------|-------------------------|-------------------------------------------|-----------------------------------|
| 69A-MAcH2-25-0.1MPa-1   | MQ1                 | 69A-9R2                         | MAcH2          | 25                      | 0.1                                       | MQ replicate 1                    |
| 69A-MAcH2-25-0.1MPa-2   | MQ2                 | 69A-9R2                         | MAcH2          | 25                      | 0.1                                       | MQ replicate 2                    |
| 69A-MAcH2-25-0.1MPa-3   | MQ3                 | 69A-9R2                         | MAcH2          | 25                      | 0.1                                       | MQ replicate 3                    |
| 69A-MAcH2-25-0.1MPa-4*  | MQ4                 | 69A-9R2                         | MAcH2          | 25                      | 0.1                                       | MQ replicate 4                    |
| 69A-MAcH2-25-0.1MPa-5*  | MQ5                 | 69A-9R2                         | MAcH2          | 25                      | 0.1                                       | MQ replicate 5                    |
| 69A-MAcH2-25-0.1MPa-6*  | MQ6                 | 69A-9R2                         | MAcH2          | 25                      | 0.1                                       | MQ replicate 6                    |
| 69A-MAcH2-25-0.1MPa-7*  | MQ7                 | 69A-9R2                         | MAcH2          | 25                      | 0.1                                       | MQ replicate 7                    |
| 69A-MAcH2-25-0.1MPa-8*  | MQ8                 | 69A-9R2                         | MAcH2          | 25                      | 0.1                                       | MQ replicate 8                    |
| 69A-MAcH2-25-0.1MPa-9*  | MQ9                 | 69A-9R2                         | MAcH2          | 25                      | 0.1                                       | MQ replicate 9                    |
| 69A-MAcH2-25-0.1MPa-10* | MQ10                | 69A-9R2                         | MAcH2          | 25                      | 0.1                                       | MQ replicate 10                   |
| 69A-MAcH2-25-0.1MPa-11* | MQ11                | 69A-9R2                         | MAcH2          | 25                      | 0.1                                       | MQ replicate 11                   |
| 69A-MAcH2-25-0.1MPa-12* | MQ12                | 69A-9R2                         | MAcH2          | 25                      | 0.1                                       | MQ replicate 12                   |
| 69A-FE-10-0.1MPa        | 69.FE.1.ATM10       | 69A-9R2                         | FE             | 10                      | 0.1                                       |                                   |
| 69A-FE-25-0.1MPa        | IODP.2              | 69A-9R2                         | FE             | 25                      | 0.1                                       |                                   |
| 71C-FE-25-0.1MPa        | IODP.4              | 71C-5RCC                        | FE             | 25                      | 0.1                                       |                                   |
| 72B-FE-25-0.1MPa        | IODP.5              | 72B-7R1                         | FE             | 25                      | 0.1                                       |                                   |
| 72B-H2CO2-30-0.1MPa     | 72.H2CO2.30degreesC | 72B-7R1                         | MET2           | 30                      | 0.1                                       |                                   |
| 72B-F1-10-0.1MPa        | 72.F1.2.ATM10       | 72B-7R1                         | F1             | 10                      | 0.1                                       |                                   |
| 72B-F1-10-8.2MPa        | 72.2.F1.8.2MPa      | 72B-7R1                         | F1             | 10                      | 8.2                                       |                                   |
| 72B-SRB1-10-8.2MPa      | 72.2.BSR1.8.2MPa    | 72B-7R1                         | SRB1           | 10                      | 8.2                                       |                                   |
| 74A-FE-25-0.1MPa        | IODP.6              | 74A-1R1                         | FE             | 25                      | 0.1                                       |                                   |
| 75B-F1-10-14MPa         | 75.1.F1.14MPa       | 75B-3R1                         | F1             | 10                      | 14.0                                      |                                   |
| 75B-SRB1-10-14MPa       | 75.1.BSR1.14MPa     | 75B-3R1                         | SRB1           | 10                      | 14.0                                      |                                   |
| 70C-F1-10-0.1MPa        | 700.F1.ATM10        | 70C-3R1 carbonate subsample     | F1             | 10                      | 0.1                                       |                                   |
| 70C-F2-25-0.1MPa        | F2                  | 70C-3R1                         | F2             | 25                      | 0.1                                       | F2                                |
| 70C-F2-25-0.1MPa-rep    | F2REP               | 70C-3R1                         | F2             | 25                      | 0.1                                       | F2 subculture 1                   |
| 70C-FE-25-0.1MPa        | FER1                | 70C-3R1                         | FE             | 25                      | 0.1                                       | FER1                              |
| 70C-FE-25-0.1MPa-rep    | FER1rep             | 70C-3R1                         | FE             | 25                      | 0.1                                       | FER1 subculture 1                 |
| 70C-FE-25-0.1MPa-2      | FER2                | 70C-3R1                         | FE             | 25                      | 0.1                                       | FER2                              |
| 70C-FE-25-0.1MPa-2rep   | FER2REP             | 70C-3R1                         | FE             | 25                      | 0.1                                       | FER2 subculture 1                 |
| 70C-FE-10-0.1MPa        | 700.FE.2.ATM10      | 70C-3R1 carbonate subsample     | FE             | 10                      | 0.1                                       |                                   |
| 70C-FE-25-0.1MPa-3      | IODP.3              | 70C-3R1                         | FE             | 25                      | 0.1                                       | replicate 1                       |



|                        |                     |                             |      |    |      |                             |
|------------------------|---------------------|-----------------------------|------|----|------|-----------------------------|
| 70C-MET1-25-0.1MPa     | MET1                | 70C-3R1                     | MET1 | 25 | 0.1  | MET1                        |
| 70C-MET1-25-0.1MPa-rep | MET1REP             | 70C-3R1                     | MET1 | 25 | 0.1  | MET1 subculture 1           |
| 70C-MET2-25-0.1MPa     | MET2                | 70C-3R1                     | MET2 | 25 | 0.1  | MET2                        |
| 70C-MET2-25-0.1MPa-rep | MET2REP             | 70C-3R1                     | MET2 | 25 | 0.1  | MET2 subculture 1           |
| 70C-F1-10-14MPa-1      | 70B.P.F1.1          | 70C-3R1 basaltic subsample  | F1   | 10 | 14.0 | 70B.P.F1. replicate 1       |
| 70C-F1-10-14MPa-2      | 70B.P.F1.2          | 70C-3R1 basaltic subsample  | F1   | 10 | 14.0 | 70B.P.F1. replicate 2       |
| 70C-F1-10-14MPa-3      | 70O.P.F1.1          | 70C-3R1 carbonate subsample | F1   | 10 | 14.0 | 70O.P.F1.replicate 1        |
| 70C-F1-10-14MPa-4      | 70O.P.F1.2          | 70C-3R1 carbonate subsample | F1   | 10 | 14.0 | 70O.P.F1.replicate 2        |
| 70C-FE-10-14MPa-1      | 70O.P.FE.1          | 70C-3R1 carbonate subsample | FE   | 10 | 14.0 |                             |
| 70C-FE-10-14MPa-2      | 70B.P.FE.1          | 70C-3R1 basaltic subsample  | FE   | 10 | 14.0 |                             |
| 70C-FE-10-14MPa-3      | REPIQ.70B.Fe.1 4MPa | 70C-3R1                     | FE   | 10 | 14.0 | 70B.Fe.14MPa subculture 1   |
| 70C-MET1-10-14MPa      | 70B.1.MET1.14 MPa   | 70C-3R1 basaltic subsample  | MET1 | 10 | 14.0 | 70B.1.MET.14MPa replicate 1 |
| 70C-MET2-10-14MPa-1    | 70B.1.MET2.14 MPa   | 70C-3R1 basaltic subsample  | MET2 | 10 | 14.0 | 70B.1.MET.14MPa replicate 2 |
| 70C-MET2-10-14MPa-2    | 70B.P.MET2.1        | 70C-3R1 basaltic subsample  | MET2 | 10 | 14.0 | 70B.P.MET2. replicate 1     |
| 70C-MET2-10-14MPa-3    | 70B.P.MET2.2        | 70C-3R1 carbonate subsample | MET2 | 10 | 14.0 | 70B.P.MET2. replicate 2     |
| 70C-MET2-10-14MPa-4    | 70O.P.MET2.1        | 70C-3R1 carbonate subsample | MET2 | 10 | 14.0 | 70O.P.MET2. replicate 1     |
| 70C-MET2-10-14MPa-5    | 70O.P.MET2.2        | 70C-3R1 carbonate subsample | MET2 | 10 | 14.0 | 70O.P.MET2. replicate 2     |
| 70C-SRB1-10-14MPa      | 70B.1.BSR1.14M Pa   | 70C-3R1 basaltic subsample  | SRB1 | 10 | 14.0 |                             |
| 70C-SRB2-10-14MPa      | 70B.2.BSR2.14M Pa   | 70C-3R1 basaltic subsample  | SRB2 | 10 | 14.0 |                             |

\* 69A-MACH2-25-0.1MPa-4 to 69A-MACH2-25-0.1MPa-12 (corresponding to MQ4 to MQ12 in SRA) are not presented in this paper due the very high similarity of their microbial community composition with 69A-MACH2-25-0.1MPa-3. mbsf stands for meters below seafloor. mbsl stands for meters below sea level.

**Supplementary Table 3.** Fatty acids compositions (given in percentage) of strain 70B-A<sup>T</sup> and type strains of related genera: *V. guaymasensis*<sup>T</sup> (Lakhal et al., 2013) and *N. pectinivora*<sup>T</sup> (Sorokin et al., 2012). The dominant fatty acids (> 10% of the total fatty acids) are indicated in bold for each strain.

| Fatty acids       | 70B-A <sup>T</sup> | <i>V. guaymasensis</i> <sup>T</sup> | <i>N. pectinivora</i> <sup>T</sup> |
|-------------------|--------------------|-------------------------------------|------------------------------------|
| iso DMA-C15:0     | -                  | <b>10.0</b>                         | -                                  |
| anteiso C15:0     | 0.28               | <b>22.7</b>                         | -                                  |
| anteiso DMA-C15:0 | -                  | <b>10.8</b>                         | -                                  |
| iso C15:0         | 0.19               | <b>13.7</b>                         | 1.6                                |
| DMA C16:0         | 2.45               | 5.5                                 | -                                  |
| C16:0             | <b>22.1</b>        | 7.0                                 | <b>46.9</b>                        |
| C16:1 w7c         | <b>35.6</b>        | -                                   | <b>11.5</b>                        |
| C16:1 w7c DMA*    | <b>14.3</b>        | -                                   | -                                  |
| C18:1 w7c         | 8.2                | -                                   | <b>17.5</b>                        |
| C18:1 w7t         | -                  | -                                   | 6.0                                |

\*DMA = dimethyl acetals

### Supplementary References

- Balch, W. E., Fox, G. E., Magrum, L. J., Woese, C. R., and Wolfe, R. S. (1979). Methanogens: reevaluation of a unique biological group. *Microbiol. Rev.* 43, 260-296.
- Lakhal, R., Pradel, N., Postec, A., Hamdi, M., Ollivier, B., Godfroy, A., et al. (2013). *Vallitalea guaymasensis* gen. nov., sp. nov., isolated from marine sediment. *Int. J. Syst. Evol. Microbiol.* 63, 3019-3023. doi: 10.1099/ijvs.0.045708-0.
- Mason, O. U., Nakagawa, T., Rosner, M., Van Nostrand, J. D., Zhou, J., Maruyama, A., et al. (2010). First investigation of the microbiology of the deepest layer of ocean crust. *PLoS ONE* 5(11), e15399. doi: 10.1371/journal.pone.0015399.
- Sorokin, D., Tourova, T., Panteleeva, A., Kaparullina, E., and Muyzer, G. (2012). Anaerobic utilization of pectinous substrates at extremely haloalkaline conditions by *Natranaerovirga pectinivora* gen. nov., sp. nov., and *Natranaerovirga hydrolytica* sp. nov., isolated from hypersaline soda lakes. *Extremophiles* 16(2), 307-315. doi: 10.1007/s00792-012-0431-6.
- Widdel, F., and Pfennig, N. (1981). Studies on dissimilatory sulfate-reducing bacteria that decompose fatty acids. I. Isolation of new sulfate reducing bacteria enriched with acetate from saline environments. Description of *Desulfobacter postgatei* gen. nov., sp. nov. *Arch. Microbiol.* 129, 395-400. doi: 10.1007/BF00406470.
